# Supplementary material
Source: PubMed Central journal article supplement (PMC4311829)
Supplement: pnas.201423603SI.pdf [file pnas.201423603SI.pdf]

# Supporting Information

Zhong et al. 10.1073/pnas.1423603112

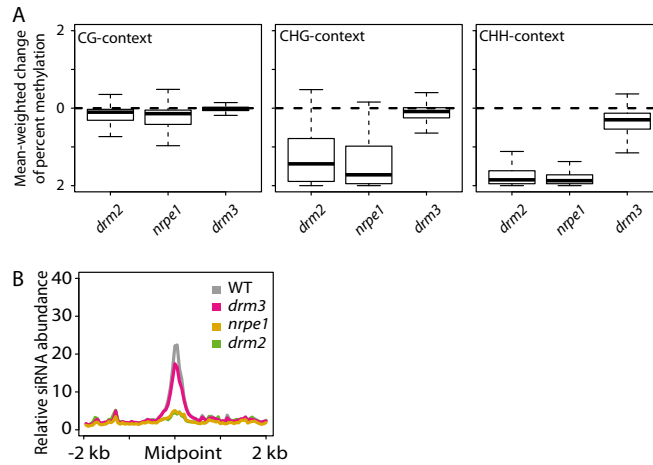

**Fig. S1.** Related to Fig. 1. DRM3 has moderate effects on DNA methylation and siRNA accumulation levels at RNA-directed DNA methylation targets. (A) Mean-weighted change [(% methylation in mutant – % methylation in WT)/mean(% methylation in mutant, % methylation in WT)] in methylation at *drm2* CHH hypo-DMRs. In all three contexts, the reductions in methylation in *drm2* and *nrpe1* are more severe than *drm3* ( $P < 2.2e-16$ ; Wilcoxon rank sum test). (B) Average levels of 24-nt siRNA over *drm2* CHH hypo-DMRs.

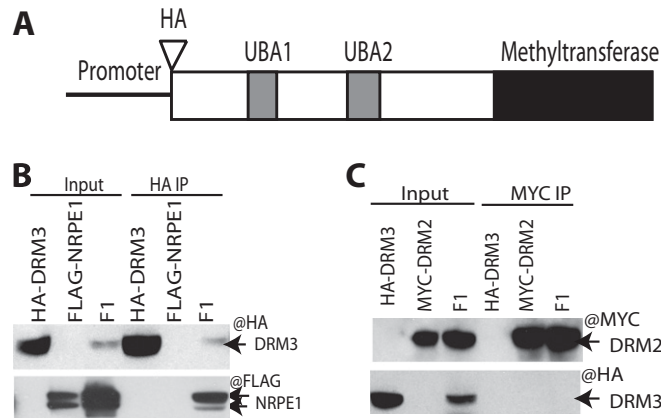

**Fig. S2.** Related to Fig. 3. DRM3 is associated with Pol V in vivo. (A) Schematic representation of domain structures of the epitope-tagged DRM3. (B) Coimmunoprecipitation assay confirming DRM3–NRPE1 interaction. (C) DRM3 doesn't interact with DRM2 by Co-IP.

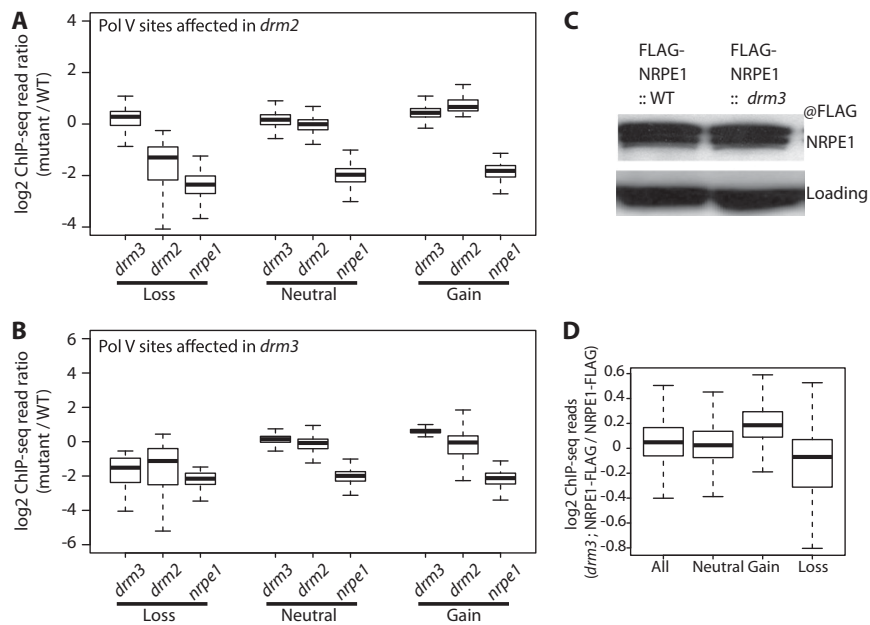

**Fig. 53.** Related to Fig. 4. Alteration of Pol V occupancy at defined binding sites in various mutants. (A) Ratio of ChIP-seq reads in various genotypes relative to WT at Pol V sites classified by the behavior of Pol V in *drm2* or (B) *drm3* ("Loss," "Neutral," or "Gain"). (C) Western blot detecting the NRPE1-FLAG protein levels in WT and a *drm3* mutant. (D) Ratio of ChIP-seq reads from an IP of NRPE1-FLAG in *drm3* compared with the NRPE1-FLAG IP in WT over all defined Pol V sites as well as Pol V sites classified by change of occupancy in a *drm3* mutant. "Gain" sites are significantly increased relative to "neutral" sites ( $P < 2.2 \times 10^{-16}$ ; Wilcoxon rank sum test). "Loss" sites are significantly decreased relative to "neutral" sites ( $P = 3.211 \times 10^{-9}$ ; Wilcoxon rank sum test).

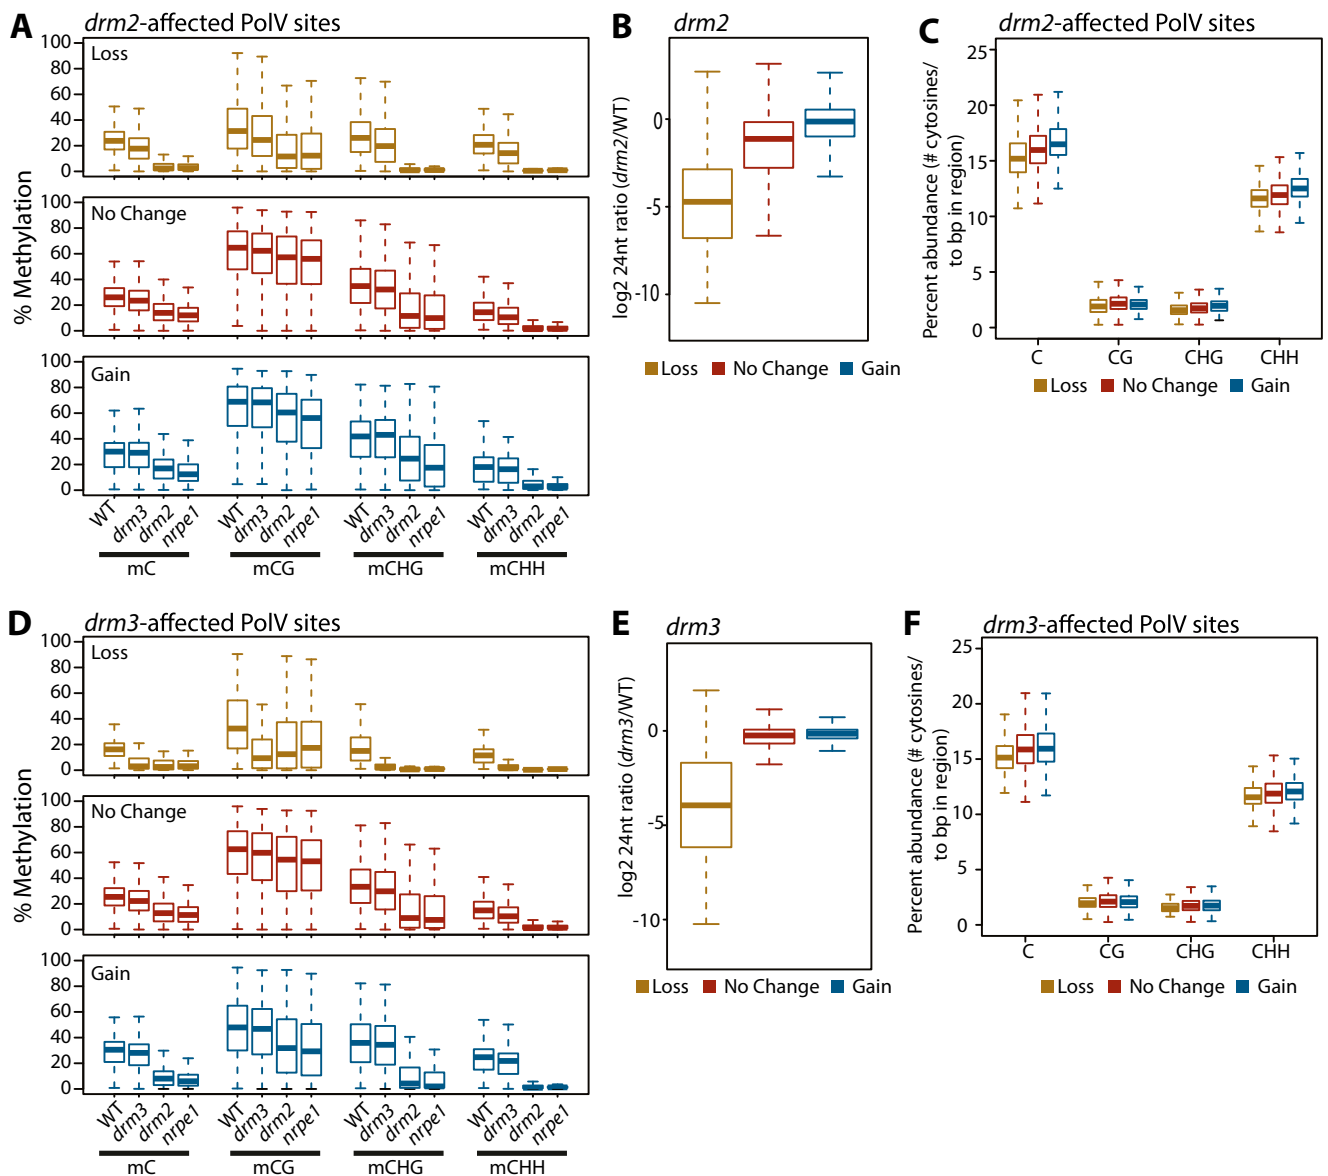

**Fig. S4.** Related to Fig. 5. Pol V association with chromatin in *drm* mutants is correlated with DNA methylation levels, siRNA levels, and cytosine contents at binding sites. (A) Methylation levels for different cytosine contexts at the loss, gain, or no change in *drm2* Pol V sites across multiple genotypes. Methylation levels for CG, CHG, and CHH are significantly lower at *drm2* loss sites compared with methylation levels at *drm2* neutral sites ( $P < 2.2e-16$ ; Wilcoxon rank sum test). Overall methylcytosine levels are also lower at *drm2* loss sites compared with *drm2* neutral sites ( $P = 2.276e-08$ ; Wilcoxon rank sum test). (B) The ratio of 24-nt sRNAs abundance of *drm2*/WT at Pol V sites classified by behavior in *drm2* ("Loss," "No Change," or "Gain"). "Loss" sites in *drm2* show a significantly greater decrease in siRNA levels than "No Change" sites ( $P < 2.2e-16$ ; Wilcoxon rank sum test) whereas "Gain" sites show a smaller decrease than "No Change" sites ( $P < 2.2e-16$ ; Wilcoxon rank sum test). (C) Percentage of cytosines found at Pol V sites classified by behavior in *drm2* ("Loss," "No Change," or "Gain"). Cytosine content in all three contexts (as well as total cytosine content) is significantly lower at *drm2* "Loss" sites compared with "No Change" sites ( $P < 2.2e-16$  for C and CG sites,  $P = 3.933e-13$  for CHG sites, and  $P = 1.661e-09$  for CHH sites; Wilcoxon rank sum test). (D) Same as A except sites are classified based on change of Pol V occupancy in *drm3*. Methylation levels for C, CG, and CHG methylation are lower at *drm3* loss sites compared with methylation levels at *drm3* neutral sites ( $P < 2.2e-16$ ; Wilcoxon rank sum test). CHH methylcytosine levels are also lower at *drm3* loss sites compared with *drm2* neutral sites ( $P = 1.034e-05$ ; Wilcoxon rank sum test). (E) Same as B except ratio of 24-nt sRNAs of *drm3*/WT at Pol V sites classified by behavior in *drm3*. "Loss" sites in *drm3* show a greater decrease in siRNA levels than "No Change" sites ( $P < 2.2e-16$ ; Wilcoxon rank sum test) whereas "Gain" sites show a smaller decrease than "No Change" sites ( $P = 5.604e-10$ ; Wilcoxon rank sum test). (F) Same as C except at Pol V sites classified by behavior in *drm3*. Cytosine content in all three contexts (as well as total cytosine content) is lower at *drm2* "Loss" sites compared with "No Change" sites ( $P = 0.0003664$  for C site,  $P = 0.09841$  for CG,  $P = 0.0001914$  for CHG sites, and  $P = 0.02756$  for CHH sites; Wilcoxon rank sum test).



**Table S1. Listing of proteins identified in DRM3 purifications filtered at 10% of DRM3 (related to Fig. 3)**

| Protein | AGI code  | Spectra   | Unique peptides | % Coverage | NSAF | % DRM3 |
|---------|-----------|-----------|-----------------|------------|------|--------|
| DRM3    | At3g17310 | 94        | 17              | 33         | 922  | 100    |
|         | At2g27710 | 14        | 5               | 56         | 849  | 92     |
|         | At2g27720 | 13        | 5               | 56         | 788  | 85     |
|         | At3g47370 | 8         | 4               | 25         | 457  | 50     |
|         | At3g28500 | 6         | 4               | 34         | 364  | 39     |
|         | At4g32470 | 6         | 3               | 29         | 343  | 37     |
|         | At3g52580 | 7         | 4               | 24         | 325  | 35     |
| NPPE3A  | At2g15430 | 12        | 6               | 23         | 262  | 28     |
|         | At2g20450 | 5         | 3               | 25         | 260  | 28     |
|         | At5g53560 | 5         | 3               | 30         | 260  | 28     |
|         | At1g78380 | 8         | 3               | 15         | 254  | 27     |
|         | At5g25460 | 12        | 5               | 17         | 226  | 24     |
| NRPE9A  | At5g47030 | 6         | 5               | 30         | 206  | 22     |
|         | At3g16980 | 3         | 2               | 21         | 183  | 20     |
|         | At5g63310 | 6         | 3               | 13         | 181  | 20     |
|         | At4g14800 | 5         | 3               | 16         | 175  | 19     |
|         | At1g24360 | 8         | 3               | 14         | 174  | 19     |
|         | At1g54780 | 7         | 4               | 15         | 171  | 18     |
|         | At5g63570 | 11        | 6               | 21         | 162  | 17     |
|         | At3g49470 | 5         | 3               | 18         | 160  | 17     |
|         | At2g22230 | 5         | 3               | 16         | 158  | 17     |
|         | NRPE7     | At4g14660 | 4               | 4          | 32   | 157    |
| NRPE3B  | At2g15400 | 7         | 4               | 16         | 153  | 17     |
|         | At3g10060 | 5         | 3               | 20         | 151  | 16     |
|         | At5g13450 | 5         | 4               | 22         | 146  | 16     |
|         | At3g47470 | 5         | 3               | 19         | 138  | 15     |
|         | At5g67590 | 3         | 2               | 15         | 136  | 15     |
|         | At5g08530 | 9         | 5               | 13         | 129  | 14     |
|         | At4g01150 | 3         | 2               | 18         | 127  | 14     |
| NRPE11  | At5g22580 | 2         | 2               | 22         | 125  | 14     |
|         | At3g52090 | 2         | 2               | 17         | 120  | 13     |
| NRPE2   | At3g23780 | 20        | 13              | 14         | 119  | 13     |
|         | At2g24020 | 3         | 3               | 19         | 114  | 12     |
|         | At1g13280 | 4         | 2               | 11         | 109  | 12     |
|         | At3g06030 | 3         | 2               | 16         | 105  | 11     |
|         | At5g10160 | 3         | 3               | 14         | 95   | 10     |
| NRPE1   | At1g78830 | 6         | 3               | 9          | 92   | 10     |
|         | At2g40030 | 20        | 13              | 8          | 70   | 8      |

The percentage of DRM3 (% DRM3) column indicates the approximate stoichiometry of each copurifying protein as a function of the normalized spectral abundance factor (NSAF). Arabidopsis Genome Initiative (AGI) code uniquely defines a specific locus in the genome.

**Table S2. Listing of proteins identified in NRPE1 purifications filtered at 0.2% of NRPE1 (related to Fig. 3)**

| Protein    | AGI code  | Spectra | Unique peptides | % Coverage | NSAF  | % NRPE1 |
|------------|-----------|---------|-----------------|------------|-------|---------|
| NRPE1      | At2g40030 | 1,645   | 185             | 53         | 5,167 | 100     |
| NPPE12     | At5g41010 | 37      | 7               | 75         | 4,503 | 87      |
| NRPE5      | At3g57080 | 156     | 17              | 40         | 4,361 | 84      |
| NPPE3A     | At2g15430 | 210     | 31              | 62         | 4,086 | 79      |
| NRPE11     | At3g52090 | 73      | 12              | 73         | 3,906 | 76      |
| NRPE3B     | At2g15400 | 172     | 23              | 59         | 3,346 | 65      |
| NRPE9A     | At3g16980 | 61      | 11              | 60         | 3,321 | 64      |
| NPPE9B     | At4g16265 | 51      | 11              | 55         | 2,777 | 54      |
| NRPE2      | At3g23780 | 472     | 70              | 36         | 2,500 | 43      |
| NRPE10     | At1g11475 | 17      | 2               | 13         | 1,486 | 29      |
| NRPE5-Like | At3g54490 | 50      | 9               | 32         | 1,332 | 26      |
|            | At1g72730 | 58      | 13              | 26         | 870   | 17      |
| NRPE6A     | At5g51940 | 18      | 7               | 51         | 776   | 15      |
| NRPE4      | At4g15950 | 19      | 3               | 16         | 737   | 14      |
| NRPE7      | At4g14660 | 19      | 6               | 36         | 663   | 13      |
|            | At1g55060 | 23      | 4               | 14         | 620   | 12      |
| NRPE8A     | At1g54250 | 6       | 3               | 27         | 255   | 5       |
|            | At5g52420 | 8       | 2               | 5          | 205   | 4       |
| NRPE6B     | At2g04630 | 4       | 4               | 35         | 172   | 3       |
|            | At3g10450 | 5       | 5               | 19         | 160   | 3       |
|            | At5g46930 | 2       | 2               | 25         | 148   | 3       |
| AGO4       | At2g27040 | 20      | 14              | 19         | 134   | 2.6     |
| DMS3       | At3g49250 | 8       | 6               | 20         | 118   | 2.3     |
|            | At1g07400 | 3       | 2               | 18         | 118   | 2.3     |
|            | At4g31490 | 14      | 10              | 13         | 91    | 1.7     |
|            | At4g38510 | 6       | 5               | 15         | 76    | 1.5     |
|            | At1g10200 | 2       | 2               | 7          | 65    | 1.2     |
|            | At3g55770 | 2       | 2               | 9          | 62    | 1.2     |
|            | At3g28715 | 3       | 3               | 13         | 53    | 1.0     |
|            | At3g61240 | 4       | 2               | 5          | 49    | 0.9     |
|            | At4g21800 | 3       | 2               | 7          | 49    | 0.9     |
|            | At5g56500 | 4       | 4               | 9          | 42    | 0.8     |
|            | At2g16390 | 5       | 5               | 8          | 35    | 0.7     |
|            | At4g35260 | 2       | 2               | 11         | 34    | 0.7     |
| DRD1       | At4g11380 | 4       | 4               | 5          | 28    | 0.5     |
|            | At3g17310 | 3       | 3               | 10         | 26    | 0.5     |
|            | At2g29370 | 3       | 3               | 6          | 22    | 0.4     |
| DRM3       | At4g31160 | 6       | 5               | 4          | 20    | 0.4     |
|            | At5g42220 | 2       | 2               | 3          | 14    | 0.3     |
|            | At5g04290 | 3       | 3               | 3          | 13    | 0.2     |

The percentage of NRPE1 (% NRPE1) column indicates the approximate stoichiometry of each copurifying protein as a function of the normalized spectral abundance factor (NSAF).
